# Supplementary material
Source: PubMed Central journal article supplement (PMC2959177)
Supplement: Supp_Table.pdf [file Supp_Table.pdf]

SUPPLEMENTAL TABLE 1. ARTICLES PUBLISHED AS FIRST/LAST AUTHOR IN THE FIELD  
OF ANTIOXIDANT/REDOX BIOLOGY CITED OVER 1000 TIMES<sup>a</sup>

|                                                                                                                                         | <i>Total citations</i> | <i>Average citations per year</i> |
|-----------------------------------------------------------------------------------------------------------------------------------------|------------------------|-----------------------------------|
| 1. Stamler JS, Singel DJ, and Loscalzo J. Biochemistry of nitric oxide and its redox-active forms. <i>Science</i> 258: 1898–1902, 1992. | 1857                   | 96.89                             |
| 2. Welch GN and Loscalzo J. Homocysteine and atherothrombosis. <i>N Engl J Med</i> 338: 1042–1050, 1998.                                | 1089                   | 83.77                             |

<sup>a</sup>Current as of March 23, 2010.

SUPPLEMENTAL TABLE 2. ARTICLES PUBLISHED AS FIRST/LAST AUTHOR IN THE FIELD OF ANTIOXIDANT/REDOX BIOLOGY CITED OVER 100 TIMES<sup>a</sup>

|                                                                                                                                                                                                                                                                                                               | Total citations | Average citations per year |
|---------------------------------------------------------------------------------------------------------------------------------------------------------------------------------------------------------------------------------------------------------------------------------------------------------------|-----------------|----------------------------|
| 1. Stamler JS, Simon DI, Osborne JA, Mullins ME, Jaraki O, Michel T, Singel DJ, and Loscalzo J. S-nitrosylation of proteins with nitric oxide—synthesis and characterization of biologically-active compounds. <i>PNAS</i> 89: 444–448, 1992.                                                                 | 937             | 49.32                      |
| 2. Stamler JS, Jaraki O, Osborne J, Simon DI, Keaney J, Vita J, Singel D, Valeri CR, and Loscalzo J. Nitric oxide circulates in mammalian plasma primarily as an S-nitroso adduct of serum albumin. <i>PNAS</i> 89: 7674–7677, 1992.                                                                          | 844             | 44.42                      |
| 3. Stamler JS, Osborne JA, Jaraki O, Rabbani LE, Mullins M, Singel D, and Loscalzo J. Adverse vascular effects of homocysteine are modulated by endothelium-derived relaxing factor and related oxides of nitrogen. <i>J Clin Invest</i> 91: 308–318, 1993.                                                   | 563             | 31.28                      |
| 4. Loscalzo J. The oxidant stress of hyperhomocyst(e)inemia. <i>J Clin Invest</i> 98: 5–7, 1996.                                                                                                                                                                                                              | 478             | 31.87                      |
| 5. Loscalzo J, Weinfeld M, Fless GM, and Scanu AM. Lipoprotein(a), fibrin binding, and plasminogen activation. <i>Arteriosclerosis</i> 10: 240–245, 1990.                                                                                                                                                     | 400             | 19.05                      |
| 6. Upchurch GR, Welch GN, Fabian AJ, Freedman JE, Johnson JL, Keaney JF, and Loscalzo J. Homocyst(e)ine decreases bioavailable nitric oxide by a mechanism involving glutathione peroxidase. <i>J Biol Chem</i> 272: 17012–17017, 1997.                                                                       | 397             | 28.36                      |
| 7. Loscalzo J and Welch G. Nitric oxide and its role in the cardiovascular system. <i>Prog Cardiovasc Dis</i> 38: 87–104, 1995.                                                                                                                                                                               | 296             | 18.50                      |
| 8. Cooke JP, Stamler J, Andon N, Davies PF, McKinley G, and Loscalzo J. Flow stimulates endothelial cells to release a nitrovasodilator that is potentiated by reduced thiol. <i>Am J Physiol</i> 259: H804–H812, 1990.                                                                                       | 226             | 10.76                      |
| 9. Eberhardt RT, Forgione MA, Cap A, Leopold JA, Rudd MA, Trollet M, Heydrick S, Stark R, Klings ES, Moldovan NI, Yaghoubi M, Goldschmidt-Clermont PJ, Farber HW, Cohen R, and Loscalzo J. Endothelial dysfunction in a murine model of mild hyperhomocyst(e)inemia. <i>J Clin Invest</i> 106: 483–491, 2000. | 217             | 19.73                      |
| 10. Scharfstein JS, Keaney JF, Slivka A, Welch GN, Vita JA, Stamler JS, and Loscalzo J. In vivo transfer of nitric oxide between a plasma protein bound reservoir and low-molecular-weight thiols. <i>J Clin Invest</i> 94: 1432–1439, 1994.                                                                  | 198             | 11.65                      |
| 11. Price DT and Loscalzo J. Cellular adhesion molecules and atherogenesis. <i>Am J Med</i> 107: 85–97, 1999.                                                                                                                                                                                                 | 196             | 16.33                      |
| 12. Loscalzo J. Nitric oxide insufficiency, platelet activation, and arterial thrombosis. <i>Circ Res</i> 88: 756–762, 2001.                                                                                                                                                                                  | 193             | 19.30                      |
| 13. Stamler J, Mendelsohn ME, Amarante P, Smick D, Andon N, Davies PF, Cooke JP, and Loscalzo J. N-acetylcysteine potentiates platelet inhibition by endothelium-derived relaxing factor. <i>Circ Res</i> 65: 789–795, 1989.                                                                                  | 187             | 8.50                       |
| 14. Ignarro LJ, Napoli C, and Loscalzo J. Nitric oxide donors and cardiovascular agents modulating the bioactivity of nitric oxide: an overview. <i>Circ Res</i> 90: 21–28, 2002.                                                                                                                             | 161             | 17.89                      |
| 15. Loscalzo J. N-acetylcysteine potentiates inhibition of platelet aggregation by nitroglycerin. <i>J Clin Invest</i> 76: 703–708, 1985.                                                                                                                                                                     | 157             | 6.04                       |
| 16. Marks DS, Vita JA, Folts JD, Keaney JF, Welch GN, and Loscalzo J. Inhibition of neointimal proliferation in rabbits after vascular injury by a single treatment with a protein adduct of nitric oxide. <i>J Clin Invest</i> 96: 2630–2638, 1995.                                                          | 149             | 9.93                       |
| 17. Loscalzo J. Homocysteine trials—clear outcomes for complex reasons. <i>N Engl J Med</i> 354: 1629–1632, 2006.                                                                                                                                                                                             | 129             | 25.80                      |
| 18. Stamler JS, Simon DI, Jaraki O, Osborne JA, Francis S, Mullins M, Singel D, and Loscalzo J. S-nitrosylation of tissue-type plasminogen activator confers vasodilatory and antiplatelet properties on the enzyme. <i>Proc Natl Acad Sci USA</i> 89: 8087–8091, 1992.                                       | 122             | 6.42                       |
| 19. Zai A, Rudd MA, Scribner AW, and Loscalzo J. Cell-surface protein disulfide isomerase catalyzes transnitrosation and regulates intracellular transfer of nitric oxide. <i>J Clin Invest</i> 103: 393–399, 1999.                                                                                           | 121             | 10.08                      |
| 20. Mendelsohn ME, Oneill S, George D, and Loscalzo J. Inhibition of fibrinogen binding to human platelets by S-nitroso-N-acetylcysteine. <i>J Biol Chem</i> 265: 19028–19034, 1990.                                                                                                                          | 109             | 5.19                       |
| 21. Weiss N, Zhang YY, Heydrick S, Bierl C, and Loscalzo J. Overexpression of cellular glutathione peroxidase rescues homocyst(e)ine-induced endothelial dysfunction. <i>Proc Natl Acad Sci USA</i> 98: 12503–12508, 2001.                                                                                    | 105             | 10.50                      |
| 22. Stamler JS and Loscalzo J. Capillary zone electrophoretic detection of biological thiols and their S-nitrosated derivatives. <i>Anal Chem</i> 64: 779–785, 1992.                                                                                                                                          | 101             | 5.32                       |

<sup>a</sup>Current as of March 23, 2010.
